# Supplementary material for: Borrelia miyamotoi Infections in Humans and Ticks, Northeastern China
Source: PubMed Central journal article supplement (PMC5782893; doi:10.3201/eid2402.160378), 2018-02
Supplement: 16-0378-Techapp-s1.pdf [file 16-0378-Techapp-s1.pdf]

# *Borrelia miyamotoi* Infections in Humans and Ticks, Northeastern China

## Technical Appendix

### Sequence Amplification of *Borrelia miyamotoi* Infection

Primer Brm1/Brm2 was used for real-time PCR screening of *B. miyamotoi* (353-bp) infection, the positive representative melting temperature peaks in  $86 \pm 0.5^\circ\text{C}$ . All the positive outcomes (353-bp) were sequenced. For every positive specimens, primer Bf1 (or rrs1F)/rrs4R was used as nested-PCR outer primers, Bf1 (or rrs1F)/BmR and BmF/rrs4R were used as inner primers for amplification front and back fragments of *rrs* gene respectively, splicing with middle fragments (Brm1/Brm2, 353-bp), eventually a 1499-bp or 1523-bp fragments for *rrs* gene was acquired based on overlapping sequence. Primer FLA120F/FLA920R was used as nested-PCR outer primers, FLA120F/flab625R as inner primers for amplification *fla* gene partial sequences (506-bp). Primer glpQ67F/glpQ789R was used as nested-PCR outer primers, glpQ67F (or glpQ86F) /glpQ546R as inner primers for amplification *glpQ* gene partial sequences (480-bp or 461-bp).

**Technical Appendix Table 1.** Nucleotide sequences of the primers used in the study

| Target gene | Primer   | Sequence (5'-3')                | Position* | Objective                        | Reference  |
|-------------|----------|---------------------------------|-----------|----------------------------------|------------|
| <i>rrs</i>  | Brm1     | CGCTGTAAACGATGCACACTTGGTGTTAATC | 807F      | Screening of <i>B.</i>           | (1)        |
|             | Brm2     | CGGCAGTCTCGTCTGAGTCCCATCT       | 1159R     | <i>miyamotoi</i> (353-bp)        | (1)        |
|             | Bf1      | GCTGGCAGTGCCTTAAGC              | 38F       | Amplification and                | (1)        |
|             | rrs1F    | GTTTGATCCTGGCTTAGAAC            | 14F       | splicing <i>rrs</i> complete     | (2)        |
|             | rrs4R    | GAGGTGATCCAGCCACACTTT           | 1536R     | sequence                         | (2)        |
|             | BmF      | AGATGGGGACTCAGACGAGACTGCCG      | 1134F     |                                  | This study |
|             | BmR      | GATTAACACCAAGTGTGCATCGTTTACAGCG | 837R      |                                  | This study |
| <i>fla</i>  | FLA120F  | AGAATTAATMGHGCWTCTGATGATG       | 103F      | Amplification <i>fla</i> partial | (1)        |
|             | FLA920R  | TGCYACAAYHTCATCTGTCATT          | 912R      | sequence (506-bp)                | (1)        |
|             | Flab625R | CTGGAGCTGCTTGAGCACCTTCT         | 622R      |                                  | This study |
| <i>glpQ</i> | glpQ67F  | ATGGGTTCAAACAAAAGTCACC          | 67F       | Amplification <i>glpQ</i>        | This study |
|             | glpQ86F  | CACCATTRATYATAGCTCACAG          | 86F       | partial sequence (461-           | This study |
|             | glpQ546R | GATGTCTTTACCTGTTGTTTATGCCA      | 546R      | bp)                              | This study |
|             | glpQ789R | CCAGGGTCCAATTCCATCAGAATATT      | 789R      |                                  | This study |

\*F, forward direction; R, reverse direction. Primers position are referring to the corresponding sequence of *rrs*, *fla*, and *glpQ* of *B. miyamotoi*.

**Technical Appendix Table 2.** *Borrelia miyamotoi* infection prevalence in ticks

| Tick species          | <i>No. B. miyamotoi</i> -positive ticks (%) |             |              |
|-----------------------|---------------------------------------------|-------------|--------------|
|                       | Male                                        | Female      | Total        |
| <i>I. persulcatus</i> | 13/343 (3.8)                                | 6/284 (2.1) | 19/627 (3.0) |
| <i>H. concinna</i>    | 1/12 (8.3)                                  | 0/24 (0)    | 1/36 (2.8)   |
| <i>D. silvarum</i>    | 0/13 (0)                                    | 0/16 (0)    | 0/29 (0)     |
| Total                 | 14/368 (3.8)                                | 6/324 (1.9) | 20/692 (2.9) |

A total of 692 adult ticks including 627 (90.6%) *I. persulcatus*, 36 (5.2%) *H. concinna*, and 29 (4.2%) *D. silvarum*.

Technical Appendix Table 3. *Borrelia miyamotoi* gene amplification in ticks

| No. | Year | Tick ID | Collection site   | Tick species          | Tick sex | <i>rrs</i>         |          | <i>fla</i> | <i>gfpQ</i> |
|-----|------|---------|-------------------|-----------------------|----------|--------------------|----------|------------|-------------|
|     |      |         |                   |                       |          | <i>rrs</i> partial | complete | partial    | partial     |
| 1   | 2013 | 101     | E44°55', N129°30' | <i>I. persulcatus</i> | Female   | 353 bp             | NA.      | NA         | NA          |
| 2   | 2013 | 105     | E44°55', N129°30' | <i>I. persulcatus</i> | Female   | 353 bp             | NA.      | NA         | NA          |
| 3   | 2013 | 119     | E44°55', N129°30' | <i>I. persulcatus</i> | Male     | 353 bp             | NA.      | NA         | NA          |
| 4   | 2013 | 176     | E44°55', N129°30' | <i>H. concinna</i>    | Male     | 353 bp             | NA.      | NA         | NA          |
| 5   | 2013 | 237     | E44°55', N129°30' | <i>I. persulcatus</i> | Female   | 353 bp             | NA.      | NA         | NA          |
| 6   | 2013 | 350     | E44°58', N129°13' | <i>I. persulcatus</i> | Female   | 353 bp             | 1499 bp, | 506 bp     | 461 bp      |
| 7   | 2013 | 392     | E44°58', N129°13' | <i>I. persulcatus</i> | Male     | 353 bp             | 1499 bp  | 506 bp     | 461 bp      |
| 8   | 2013 | 421     | E44°58', N129°13' | <i>I. persulcatus</i> | Male     | 353 bp             | NA.      | NA         | NA          |
| 9   | 2013 | 428     | E44°58', N129°13' | <i>I. persulcatus</i> | Male     | 353 bp             | 1499 bp  | 506 bp     | 461 bp      |
| 10  | 2013 | 544     | E44°58', N129°13' | <i>I. persulcatus</i> | Male     | 353 bp             | 1499 bp  | 506 bp     | 461 bp      |
| 11  | 2013 | 606     | E44°55', N129°30' | <i>I. persulcatus</i> | Male     | 353 bp             | 1499 bp  | NA         | 461 bp      |
| 12  | 2013 | 609     | E44°55', N129°30' | <i>I. persulcatus</i> | Male     | 353 bp             | NA.      | NA         | NA          |
| 13  | 2013 | 622     | E44°55', N129°30' | <i>I. persulcatus</i> | Male     | 353 bp             | NA.      | NA         | NA          |
| 14  | 2014 | 1       | E44°58', N129°13' | <i>I. persulcatus</i> | Male     | 353 bp             | NA.      | NA         | NA          |
| 15  | 2014 | 52      | E44°58', N129°13' | <i>I. persulcatus</i> | Female   | 353 bp             | 1499 bp  | 506 bp     | 461 bp      |
| 16  | 2014 | 114     | E44°55', N129°30' | <i>I. persulcatus</i> | Male     | 353 bp             | 1499 bp  | 506 bp     | 461 bp      |
| 17  | 2014 | 121     | E44°55', N129°30' | <i>I. persulcatus</i> | Male     | 353 bp             | NA.      | NA         | NA          |
| 18  | 2014 | 124     | E44°55', N129°30' | <i>I. persulcatus</i> | Male     | 353 bp             | NA.      | NA         | NA          |
| 19  | 2014 | 126     | E44°55', N129°30' | <i>I. persulcatus</i> | Male     | 353 bp             | NA.      | NA         | NA          |
| 20  | 2014 | 150     | E44°55', N129°30' | <i>I. persulcatus</i> | Female   | 353 bp             | NA.      | 506 bp     |             |

## References

- Hovius JW, de Wever B, Sohne M, Brouwer MC, Coumou J, Wagemakers A, et al. A case of meningoencephalitis by the relapsing fever spirochaete *Borrelia miyamotoi* in Europe. Lancet. 2013;382:658. PubMed [http://dx.doi.org/10.1016/S0140-6736\(13\)61644-X](http://dx.doi.org/10.1016/S0140-6736(13)61644-X)
- Potkonjak A, Kleinerman G, Gutiérrez R, Savić S, Vračar V, Nachum-Biala Y, et al. Occurrence of *Borrelia burgdorferi* sensu lato in *Ixodes ricinus* ticks with first identification of *Borrelia miyamotoi* in Vojvodina, Serbia. Vector Borne Zoonotic Dis. 2016;16:631–5. PubMed <http://dx.doi.org/10.1089/vbz.2016.2008>
